# Supplementary material
Source: PubMed Central journal article supplement (PMC4876541)
Supplement: Supp_Fig1.pdf [file Supp_Fig1.pdf]

## Supplementary Data

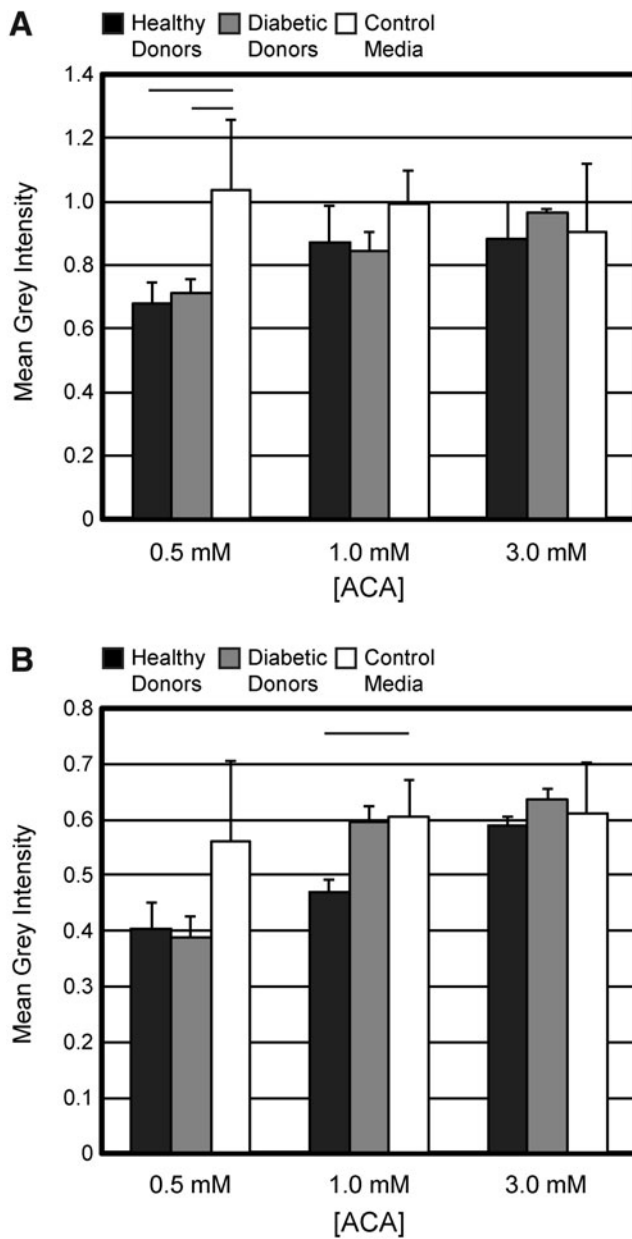

**SUPPLEMENTARY FIG. S1.** Earlier time points of fibrin construct degradation by analogy to Figure 5C. Using the same method described in Figure 5C, quantification of construct degradation was performed at day 1 (**A**) or day 4 (**B**). Data are presented as mean  $\pm$  standard deviation (SD). *Black bar* = statistically significant difference ( $p < 0.05$ ).
